# Supplementary material for: Anatomy education in US Medical Schools: before, during, and beyond COVID-19
Source: PubMed Central journal article supplement (PMC8851737; doi:10.1186/s12909-022-03177-1), 2022-02-16
Supplement: 12909_2022_3177_MOESM1_ESM.pdf [file 12909_2022_3177_MOESM1_ESM.pdf]

# Anatomy Changes during COVID

We are incredibly appreciative of your time. The survey below should not take more than 5 minutes and will be incredibly informative to the current state of anatomy education.

Please also note that any questions that begin with [PRE-COVID] pertain to your anatomy course PRIOR to COVID-19

Conversely, any questions that starts with [THIS YEAR DURING COVID] pertain specifically to the most recent cohort of students who took/are taking anatomy DURING the COVID-19 pandemic

Lastly, ALL REPORTED DATA WILL BE COMPLETELY ANONYMOUS and RESULTS WILL NOT BE ABLE TO BE TRACED BACK TO YOU OR YOUR INSTITUTION.

---

Please state the medical school you teach at (Note: All reported data will be anonymous)

---

[PRE-COVID] How is your main anatomy curriculum usually structured?

- Taught alongside organ-system blocks
- Taught as its own course (e.g. 12 weeks in a row)
- Other

---

Please describe if "other"

---

[PRE-COVID] Please describe how your anatomy lectures/didactics are usually delivered (please check all that apply)

- Lectures are given live and ARE NOT recorded
- Lectures are given live and ARE recorded
- Lectures are pre-recorded
- Pre-Readings
- Other

---

Please describe if "other"

---

[PRE-COVID] How do students usually learn during the 'anatomy lab' (non-didactic) portion of your curriculum? Please check all that apply

- Cadaver Dissection
- Cadaver Prosection
- Virtual (i.e. Holo-Lens, 3D anatomy software)
- Small Group / Team-based Learning
- Other

---

If dissection, please indicate the average number of students assigned to each cadaver

---

Please describe if "other"

---

---

[THIS YEAR DURING COVID-19] Was any part of your anatomy curriculum in-person this year? We will assume all activities were socially-distanced. Please check all that apply

- No portion of the curriculum was in-person  
 Lectures  
 Small-group/team-based learning  
 Cadaver prosection  
 Cadaver dissection  
 Other forms of practical learning
- 

Please describe if "other forms of practical learning"

---

[THIS YEAR DURING COVID] In response to the pandemic, how did you adapt your lab-based learning this year? Please check all that apply

- No change  
 Switch from dissection to prosection  
 Virtual prosection (e.g. showing images)  
 Use of Virtual application (anatomy applications, 3D software, etc.)  
 There was no lab-based component this year  
 Other
- 

Please describe if "other"

---

[PRE-COVID] During an average week of the course, how many hours of anatomy lecture are students roughly expected to attend/watch?

\_\_\_\_\_

---

[THIS YEAR DURING COVID] During an average week of the course THIS YEAR, how many hours of anatomy lecture were students roughly expected to attend/watch?

\_\_\_\_\_

---

[PRE-COVID] During an average week of the course, how many hours do students usually spend participating in practical learning (Anatomy Lab or its equivalent)

\_\_\_\_\_

---

[THIS YEAR DURING COVID] During an average week of the course THIS YEAR, how many hours did students spend participating in practical learning (Anatomy Lab or its equivalent)

\_\_\_\_\_

---

[PRE-COVID] Overall, how is time split between didactic learning (lectures) vs. practical learning (lab, small groups, Team-based Learning, etc.)

0% Lecture; 100% Practical      50% Lecture; 50% practical      100% Lecture; 0% Practical

=====

(Place a mark on the scale above)

---

[THIS YEAR DURING COVID] Overall, how was time split between didactic learning (lectures) vs. practical learning (lab, small groups, Team-based Learning, etc.) this year?

0% Lecture; 100% Practical      50% Lecture; 50% Practical      100% Lecture; 0% Practical

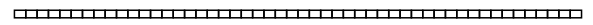

(Place a mark on the scale above)

---

[PRE-COVID] Is radiology (interpretation of X-ray, MRI, CT, etc.) taught alongside your anatomy curriculum?

- Yes  
 No

---

Did this change this year due to the pandemic?

- Yes  
 No

---

[PRE-COVID] Are clinical correlates (i.e. applications of anatomy to clinical scenarios/vignettes) taught in your anatomy curriculum?

- Yes  
 No

---

Did this change this year due to the pandemic?

- Yes  
 No

---

What supplementary materials do you provide to students? (please check all that apply)

- None  
 External Online resources  
 Anatomy Apps (for tablets, computers, phone)  
 In-house resources (i.e. guides, e-books, etc.)  
 Other

---

Please describe if "other"

---

[PRE-COVID] What is the format usually used for assessment of students? (Please check all that apply)

- In-house quizzes/exams  
 NBME Exams  
 In-person Lab Practical  
 Virtual Practical  
 Standardized Patients  
 Other

---

Please describe if "other"

---

---

How did this year's students (during COVID-19) perform on assessments as compared to previous years (prior to COVID-19)?

- Significantly worse
- Slightly worse
- The same
- Slightly better
- Significantly better

---

[PRE-COVID] Please describe the overall grading schema for your anatomy course

- Pass/Fail with no internal ranking
- Pass/Fail with external or internal ranking
- Honors, High-Pass, Pass, Fail
- Graded (Letters)
- I don't know

---

[THIS YEAR DURING COVID] Please describe the overall grading schema for your anatomy course

- Pass/Fail with no internal ranking
- Pass/Fail with external or internal ranking
- Honors, High-Pass, Pass, Fail
- Graded (Letters)
- I don't know

---

How do you think COVID-19 affected the quality of anatomy education this year at your institution?

- Significant negative impact
- Slight negative impact
- No impact
- Slight positive impact
- Significant positive impact

---

Please check all of the following that you believe contributed to this negative impact

- Anxiety related to the pandemic
- Lack of in-person learning
- Virtual learning less conducive
- Less time spent in practical learning/lab
- Lack of cadaver dissection
- Lack of cadaver prosection
- Overall less structured time for anatomy
- Disorganization
- Other

---

Please describe if "other"

---

Please check all of the following that you believe contributed to this positive impact

- Time saved from eliminating dissection
- Students learned better from virtual curriculum
- More time spent in practical learning
- Other

---

Please describe if "other"

---

Prior to COVID-19, what did you perceive to be the weakest part of your anatomy course?

---

Prior to COVID-19, when was the last major change to your anatomy curriculum? Examples include switching from dissection to prosection, switching to virtual platforms, flipped classroom, etc.

- < 5 years ago
- 5-10 years ago
- 10-15 years ago
- 15+ years ago
- Do not know

---

If possible, please specify what the change was

---

Are you anticipating any changes in the near future to your anatomy course (e.g. adoption of virtual software, transitioning to or from dissection/prosection)? If so, please briefly describe

---

Once social distancing is no longer required, do you expect your anatomy curriculum/structure to return to how it was prior to the pandemic?

- Yes
- No
- I don't know

---

If you have any additional thoughts you would like to share about how COVID-19 impacted your anatomy curriculum or your school's adaptations, please share here
